# Supplementary material for: Dry season diet composition of four-horned antelope Tetracerus quadricornis in tropical dry deciduous forests, Nepal
Source: PeerJ. 2018 Jun 25;6:e5102. doi: 10.7717/peerj.5102 (PMC6022733; doi:10.7717/peerj.5102)
Supplement: Supplemental Information 1 [file peerj-06-5102-s001.xlsx]

## Sheet: sheet1
Table : Locations of sample collection in WGS_1984_ UTM_44N projection system and plant fragments observed from sample of these locations
SN	Location		Plant species	No. of fragments
	Latitude (X)	Longititude (Y)
1	587548	3113992	Imperata cylindrica	7
			Cynodon dactylon	7
			Bambusa vulgare	5
			Acacia catechu	6
			Unidentified	5
2	587554	3113998	Zizyphus mauritiana	5
			Bambusa vulgare	6
			Bauhinia vahlii	3
			Terminalia alata	8
			Woodfordia fruiticosa	7
			Unidentified	1
3	580671	3116806	Thysanolaena maxima	9
			Digitaria spp.	5
			Xeromphis spinosa	7
			Carissa spinarum	7
			Unidentified	2
4	580692	3116859	Woodfordia fruiticosa	3
			Thysanolaena maxima	8
			Bauhinia vahlii	2
			Digitaria spp.	3
			Terminalia alata	5
			Xeromphis spinosa	5
			Carissa spinarum	2
			Unidentified	2
5	580696	3116868	Thysanolaena maxima	11
			Bauhinia vahlii	1
			Digitaria spp.	2
			Terminalia alata	1
			Xeromphis spinosa	9
			Carissa spinarum	5
			Unidentified	1
6	580696	3116868	Woodfordia fruiticosa	4
			Bauhinia vahlii	5
			Digitaria spp.	4
			Terminalia alata	3
			Xeromphis spinosa	3
			Carissa spinarum	10
			Unidentified	1
7	580741	3116951	Digitaria spp.	3
			Eulaliopsis binata	8
			Shorea robusta	4
			Themeda triandra	8
			Acacia catechu	5
			Unidentified	2
8	580756	3116996	Hemarthria compressa	8
			Eulaliopsis binata	12
			Zizyphus mauritiana	8
			Unidentified	2
9	580420	3117331	Xeromphis spinosa	7
			Zizyphus mauritiana	10
			Themeda triandra	8
			Digitaria spp.	5
10	580458	3117336	Xeromphis spinosa	8
			Zizyphus mauritiana	10
			Eulaliopsis binata	7
			Digitaria spp.	3
			Unidentified	2
11	580109	3117307	Xeromphis spinosa	8
			Imperata cylindrica	3
			Terminalia alata	2
			Shorea robusta	3
			Eulaliopsis binata	8
			Themeda triandra	3
			Unidentified	3
12	580111	3117307	Terminalia alata	7
			Woodfordia fruiticosa	4
			Carissa spinarum	6
			Themeda triandra	9
			Digitaria spp.	2
			Imperata cylindrica	2
13	580111	3117307	Terminalia alata	3
			Woodfordia fruiticosa	2
			Carissa spinarum	6
			Themeda triandra	5
			Digitaria spp.	3
			Imperata cylindrica	7
			Unidentified	4
14	568738	3130426	Nyctanthes arbortristis	8
			Themeda triandra	2
			Acacia catechu	2
			Eulaliopsis binata	10
			Eugenia spp.	8
15	568745	3130642	Hemarthria compressa	4
			Eulaliopsis binata	5
			Woodfordia fruiticosa	3
			Themeda triandra	5
			Nyctanthes arbortristis	9
			Unidentified	4
16	568848	3130851	Terminalia alata	6
			Grewia spp.	8
			Thysanolaena maxima	3
			Hemarthria compressa	11
			Heteropogon contortus	1
			Unidentified	1
17	568858	3130846	Grewia spp.	4
			Thysanolaena maxima	9
			Hemarthria compressa	9
			Heteropogon contortus	5
			Unidentified	3
18	568972	3130904	Terminalia alata	3
			Grewia spp.	2
			Hemarthria compressa	7
			Eugenia spp.	11
			Bauhinia vahlii	1
			Myrsine semiserrata	3
			Unidentified	3
19	568978	3130908	Terminalia alata	3
			Bambusa vulgare	4
			Thysanolaena maxima	5
			Grewia spp.	3
			Hemarthria compressa	2
			Eugenia spp.	8
			Bauhinia vahlii	2
			Myrsine semiserrata	3
20	569033	3130900	Terminalia alata	4
			Bambusa vulgare	5
			Grewia spp.	5
			Hemarthria compressa	5
			Heteropogon contortus	1
			Eugenia spp.	6
			Bauhinia vahlii	3
			Myrsine semiserrata	1
21	569332	3130636	Bauhinia vahlii	2
			Bambusa vulgare	3
			Nyctanthes arbortristis	10
			Woodfordia fruiticosa	3
			Acacia catechu	7
			Hemarthria compressa	5
22	568758	3130084	Zizyphus mauritiana	7
			Bambusa vulgare	5
			Terminalia chebula	7
			Nyctanthes arbortristis	8
			Terminalia alata	3
23	571993	3126453	Shorea robusta	4
			Terminalia alata	2
			Buchanania lanzans	6
			Terminalia chebula	7
			Nyctanthes arbortristis	7
			Bauhinia vahlii	1
			Unidentified	3
24	572392	3126421	Shorea robusta	5
			Bauhinia vahlii	4
			Xeromphis spinosa	2
			Hemarthria compressa	4
			Mallotus philippensis	1
			Buchanania lanzans	4
			Phyllanthus emblica	10
25	572392	3126343	Shorea robusta	4
			Phyllanthus emblica	8
			Hemarthria compressa	5
			Woodfordia fruiticosa	2
			Nyctanthes arbortristis	10
			Unidentified	1
26	597672	3103020	Acacia catechu	5
			Woodfordia fruiticosa	3
			Buchanania lanzans	5
			Phyllanthus emblica	7
			Mallotus philippensis	3
			Heteropogon contortus	3
			Cynodon dactylon	3
			Unidentified	1
27	597596	3103138	Acacia catechu	4
			Woodfordia fruiticosa	3
			Buchanania lanzans	7
			Bauhinia vahlii	4
			Heteropogon contortus	5
			Cynodon dactylon	5
			Terminalia alata	1
			Unidentified	1
28	589764	3113311	Xeromphis spinosa	3
			Bambusa vulgare	4
			Cynodon dactylon	6
			Acacia catechu	5
			Grewia spp.	3
			Nyctanthes arbortristis	5
			Bauhinia vahlii	2
			Aegle marmelos	2
29	591327	3113608	Xeromphis spinosa	2
			Bambusa vulgare	7
			Cynodon dactylon	4
			Aegle marmelos	8
			Imperata cylindrica	3
			Schleichera oleosa	4
			Grewia spp.	2
30	591289	3113356	Xeromphis spinosa	5
			Cynodon dactylon	5
			Aegle marmelos	7
			Imperata cylindrica	5
			Heteropogon contortus	2
			Acacia catechu	3
			Grewia spp.	3
31	591179	3113224	Schleichera oleosa	8
			Aegle marmelos	1
			Bambusa vulgare	3
			Asparagus phillipensis	3
			Hemarthria compressa	5
			Mallotus philippensis	5
			Acacia catechu	4
			Unidentified	1
32	591180	3113226	Terminalia alata	4
			Schleichera oleosa	11
			Asparagus phillipensis	2
			Hemarthria compressa	5
			Mallotus philippensis	4
			Unidentified	4
33	591179	3113232	Terminalia alata	3
			Schleichera oleosa	11
			Asparagus phillipensis	6
			Nyctanthes arbortristis	3
			Asparagus phillipensis	2
			Hemarthria compressa	4
			Mallotus philippensis	1
34	590500	3112022	Acacia catechu	8
			Bauhinia vahlii	1
			Asparagus phillipensis	4
			Buchanania lanzans	5
			Hemarthria compressa	3
			Schleichera oleosa	6
			Heteropogon contortus	2
			Unidentified	1
35	590482	3111977	Terminalia alata	6
			Hemarthria compressa	9
			Eugenia spp.	2
			Bauhinia vahlii	3
			Buchanania lanzans	5
			Xeromphis spinosa	5
36	590197	3111888	Acacia catechu	10
			Asparagus phillipensis	8
			Imperata cylindrica	4
			Eugenia spp.	5
			Buchanania lanzans	2
			Unidentified	1
37	612032	3099102	Phyllanthus emblica	14
			Terminalia belerica	3
			Xeromphis spinosa	6
			Zizyphus mauritiana	5
			Mallotus philippensis	1
			Unidentified	1
38	612074	3098514	Phyllanthus emblica	13
			Hemarthria compressa	9
			Xeromphis spinosa	7
			Grewia spp.	1
39	611864	3098265	Myrsine semiserrata	10
			Bauhinia vahlii	2
			Grewia spp.	3
			Aegle marmelos	8
			Woodfordia fruiticosa	2
			Heteropogon contortus	4
			Unidentified	1
40	611829	3098180	Myrsine semiserrata	5
			Bauhinia vahlii	1
			Aegle marmelos	9
			Woodfordia fruiticosa	4
			Heteropogon contortus	2
			Imperata cylindrica	5
			Unidentified	4
41	611719	3098181	Shorea robusta	6
			Clerodendrum viscosum	9
			Xeromphis spinosa	3
			Mallotus philippensis	8
			Terminalia alata	1
			Woodfordia fruiticosa	2
			Unidentified	1
42	616425	3096638	Shorea robusta	11
			Woodfordia fruiticosa	3
			Terminalia alata	1
			Terminalia chebula	6
			Mallotus philippensis	3
			Clerodendrum viscosum	6
43	608326	3099395	Terminalia chebula	8
			Heteropogon contortus	3
			Shorea robusta	4
			Buchanania lanzans	6
			Mallotus philippensis	1
			Xeromphis spinosa	7
			Grewia spp.	1
44	608362	3099434	Shorea robusta	5
			Terminalia chebula	5
			Bauhinia vahlii	2
			Xeromphis spinosa	3
			Phyllanthus emblica	8
			Mallotus philippensis	2
			Carissa spinarum	5
45	608323	3099456	Shorea robusta	9
			Bauhinia vahlii	1
			Xeromphis spinosa	5
			Phyllanthus emblica	14
			Unidentified	1
46	608324	3099498	Terminalia belerica	5
			Terminalia chebula	7
			Myrsine semiserrata	5
			Mallotus philippensis	9
			Terminalia alata	4
47	608305	3099498	Terminalia belerica	7
			Mallotus philippensis	12
			Hemarthria compressa	5
			Acacia catechu	2
			Myrsine semiserrata	2
			Unidentified	2
48	608291	3099515	Terminalia belerica	3
			Myrsine semiserrata	1
			Heteropogon contortus	2
			Imperata cylindrica	9
			Mallotus philippensis	2
			Bambusa vulgare	3
			Acacia catechu	2
			Zizyphus mauritiana	6
			Unidentified	2
49	608287	3099515	Terminalia belerica	4
			Phyllanthus emblica	9
			Imperata cylindrica	9
			Mallotus philippensis	4
			Zizyphus mauritiana	2
			Unidentified	2
50	608291	3099509	Terminalia belerica	3
			Imperata cylindrica	6
			Mallotus philippensis	10
			Zizyphus mauritiana	7
			Unidentified	4
51	608281	3099510	Heteropogon contortus	5
			Imperata cylindrica	5
			Phyllanthus emblica	7
			Zizyphus mauritiana	10
			Unidentified	3
52	608248	3099598	Acacia catechu	4
			Mallotus philippensis	8
			Phyllanthus emblica	11
			Carissa spinarum	7
53	608245	3099598	Acacia catechu	8
			Mallotus philippensis	6
			Phyllanthus emblica	9
			Carissa spinarum	7
	Total fragments			1590
Note: At last total fragments of each species were adjusted to make multiple of 5 to obtain the generalized result.
If total fragments were 42, it is considered as 40 and, if it is 43, it is considered as 45.
